# Supplementary material for: Evidence for distinct mechanisms of uptake and antitumor activity of secretory phospholipase A2 responsive liposome in prostate cancer
Source: Royal Society of Chemistry journal article supplement (doi:10.1039/c2ib20108a), 2012-07-30
Supplement: c2ib20108a.pdf [file c2ib20108a.pdf]

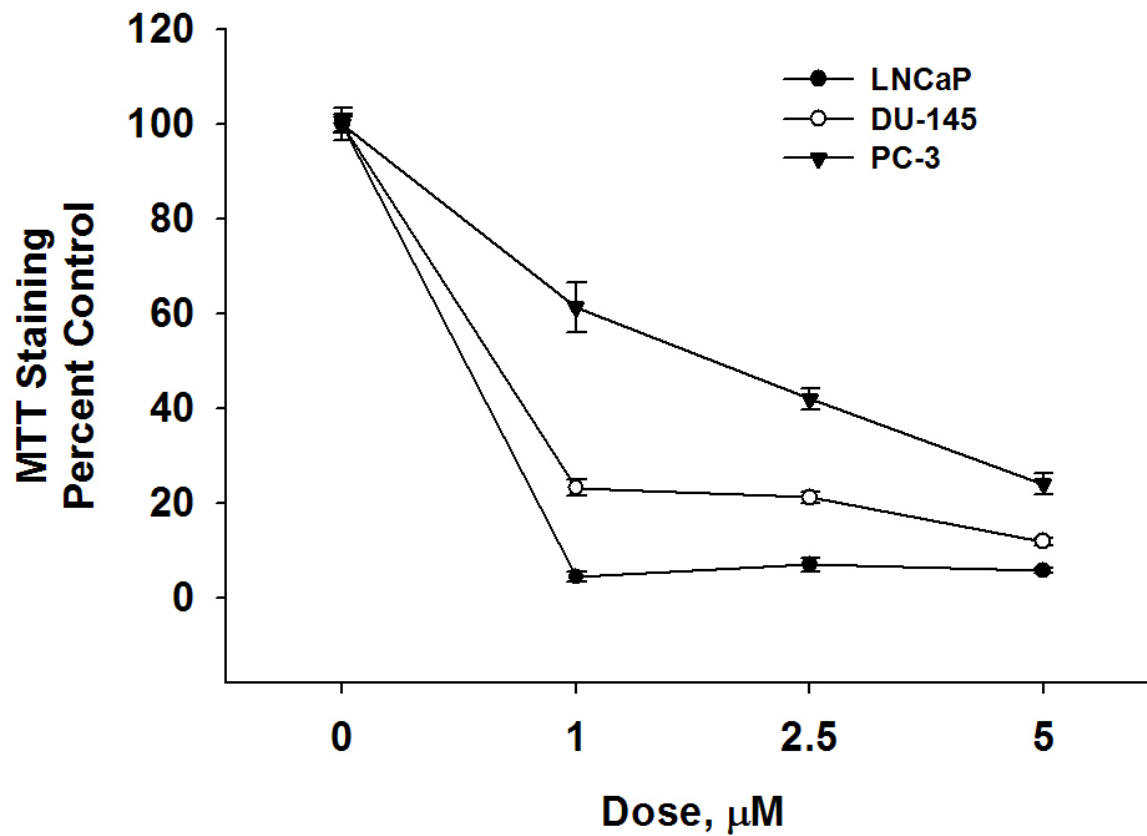

**Supplemental Figure 1.** Concentration-dependence effect of doxorubicin exposure on MTT staining in PC-3, LNCaP and DU145 cells after 72 hours. Data are presented as the mean  $\pm$  SEM of at least 3-6 different experiments.
